# Supplementary material for: Upcycle waste plastics to magnetic carbon materials for dye adsorption from polluted water
Source: Royal Society of Chemistry journal article supplement (doi:10.1039/c4ra02459a), 2014-01-01
Supplement: c4ra02459a1.pdf [file c4ra02459a1.pdf]

## Supporting Information

The EDS data are shown below, for the carbon materials from pure PP, there are about 75.69 wt% of carbon in the sample. However, there is around 56 wt% of carbon in the carbon materials from waste PP.

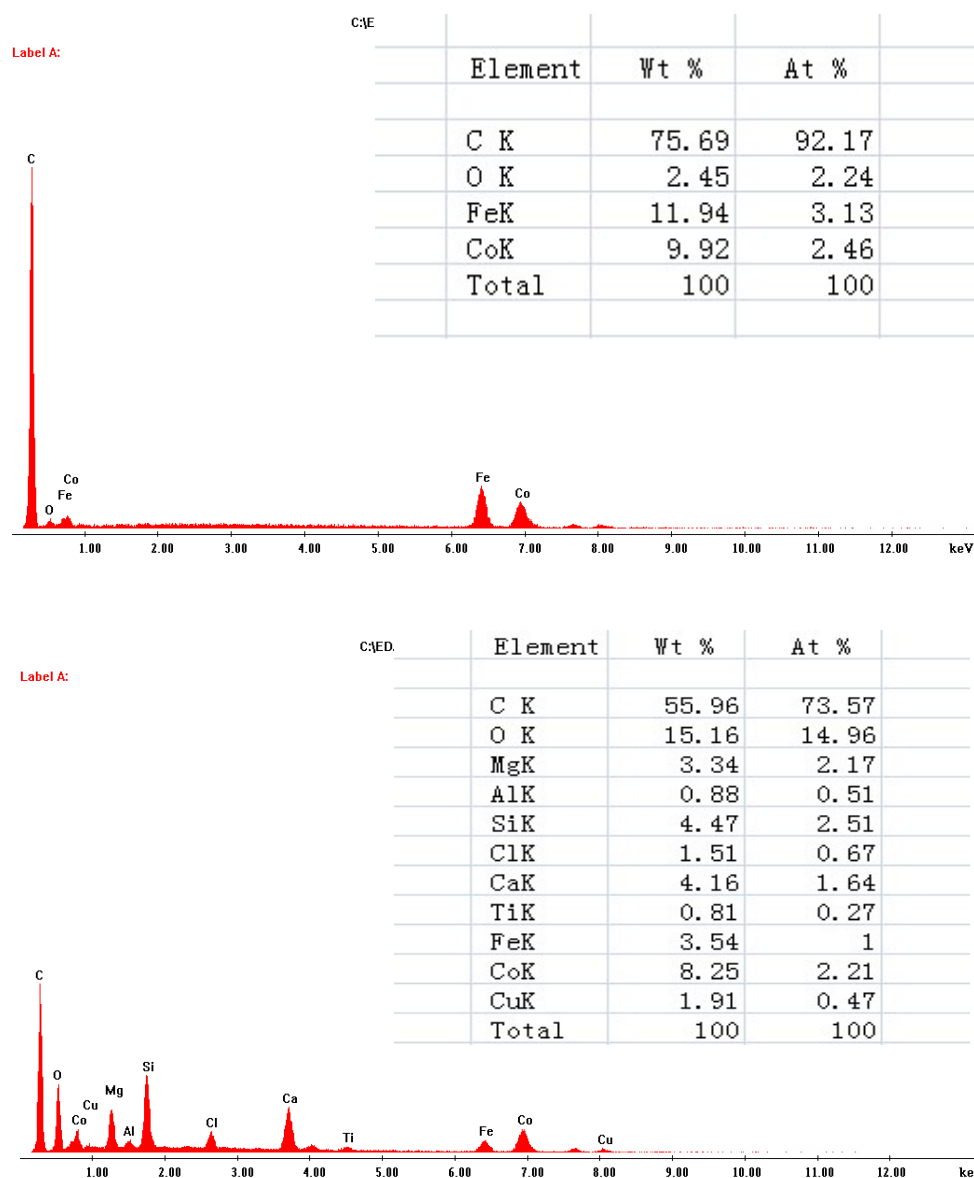

**Figure S1.** EDS data from carbon materials from pure PP (a) and Waste car bumper (b).

## Pore size distributions

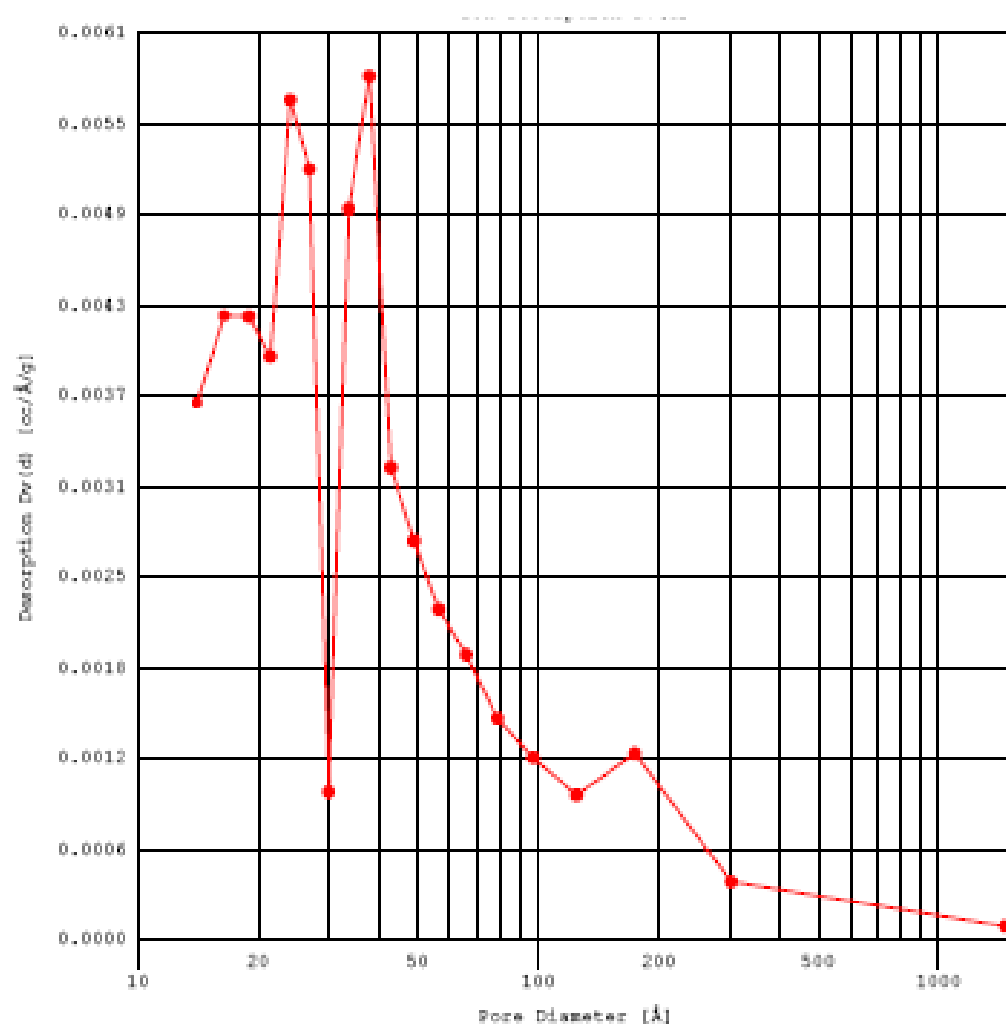

**Figure S2.** Pore size distribution of carbon materials from pure PP.

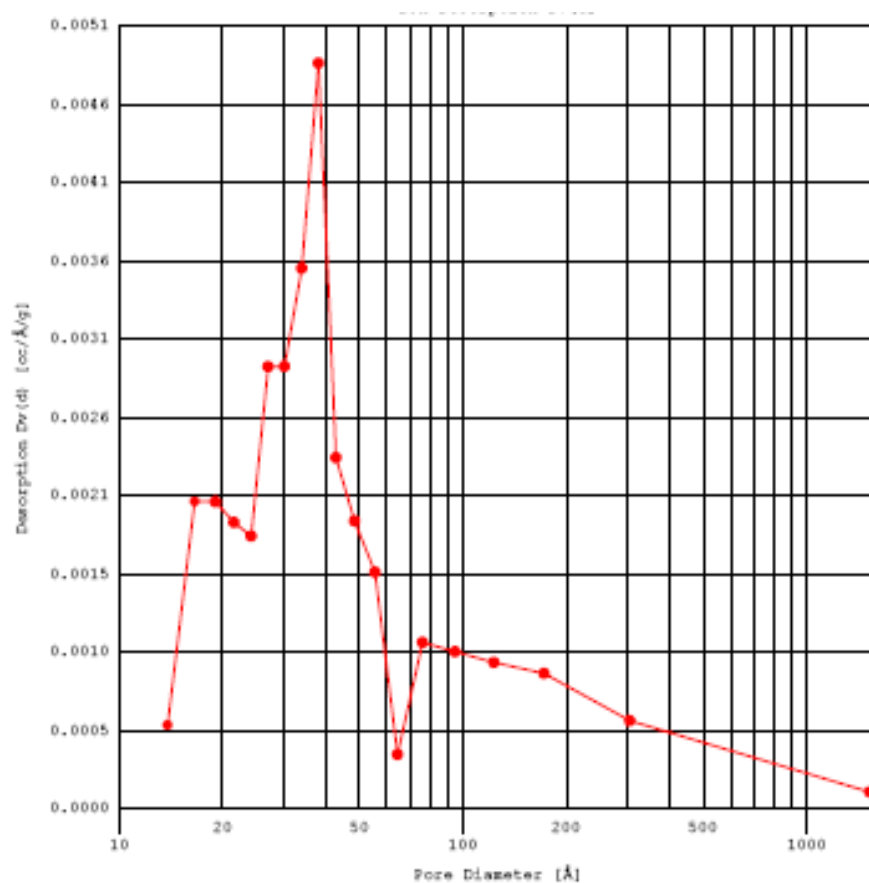

**Figure S3.** Pore size distributions of carbon materials from waste PP.
